# Supplementary material for: Self-assembly pathways and polymorphism in peptide-based nanostructures
Source: Royal Society of Chemistry journal article supplement (doi:10.1039/c7nr06724k), 2017-12-22
Supplement: c7nr06724k1.pdf [file c7nr06724k1.pdf]

## Self-assembly pathways and polymorphism in peptide-based nanostructures

N. A. Dudukovic,<sup>a,b</sup> B. C. Hudson,<sup>c</sup> A. K. Paravastu<sup>c</sup> and C. F. Zukoski<sup>d</sup>

### Supplementary Information

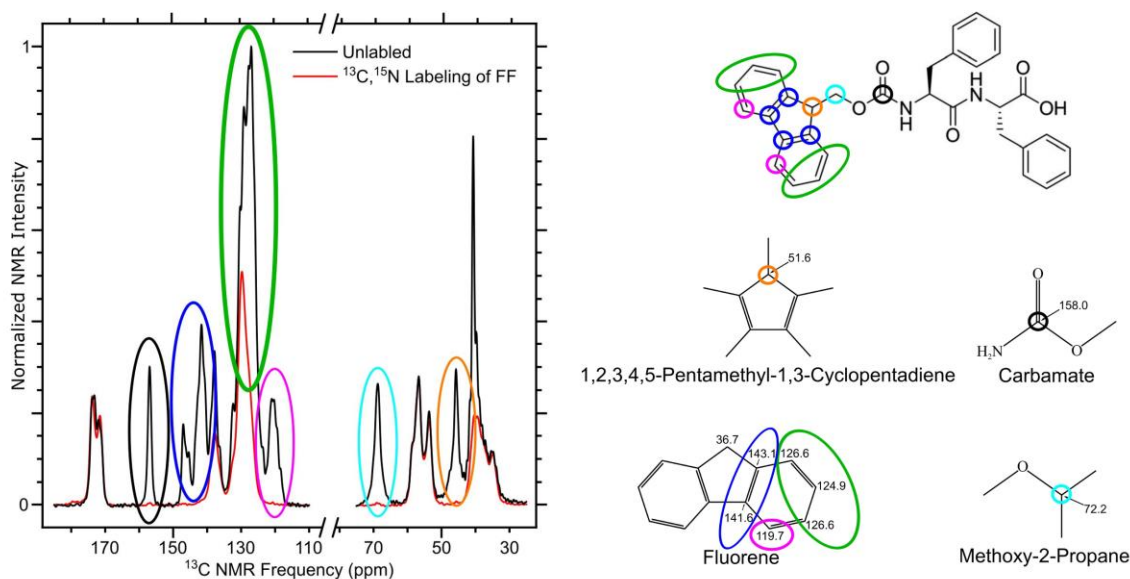

**Figure S1.** CPMAS spectra showing data for two samples of Fmoc-FF assembled in DMSO/H<sub>2</sub>O ( $x_{\text{H}_2\text{O}} = 0.95$ ). The black spectrum was obtained from the natural abundance  $^{13}\text{C}$  population in an unlabeled sample, and the red spectrum was obtained from a sample with uniform  $^{13}\text{C}$  labeling on both phenylalanine residues.

<sup>a</sup> Lawrence Livermore National Laboratory, P.O. Box 808, Livermore, CA 94551.  
E-mail: dudukovic1@llnl.gov

<sup>b</sup> Department of Chemical and Biomolecular Engineering, University of Illinois at Urbana-Champaign, Urbana, IL 61801

<sup>c</sup> School of Chemical & Biomolecular Engineering, Georgia Institute of Technology, Atlanta, GA 30332

<sup>d</sup> Chemical and Biological Engineering, University at Buffalo, Buffalo, NY 14260

†Electronic Supplementary Information (ESI) available.

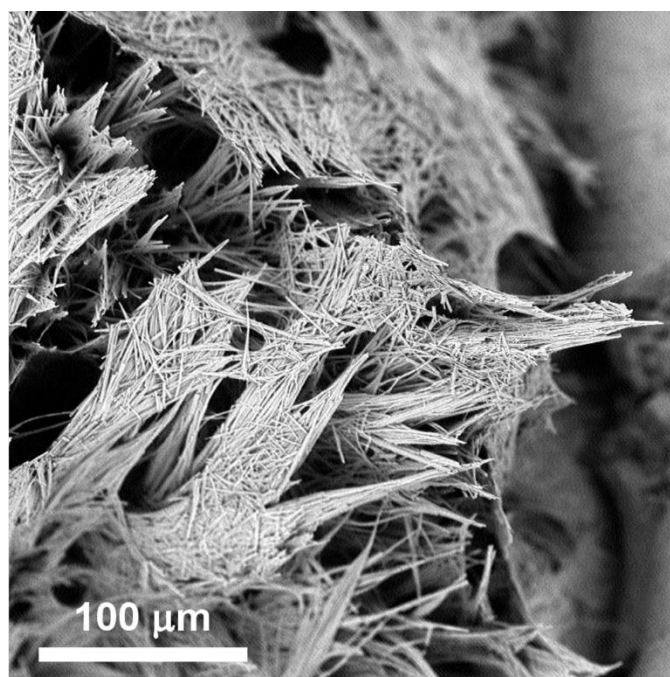

**Figure S2.** SEM image of a large crystal aggregate grown from a metastable fibrous gel state of Fmoc-FF/methanol/water.

---
